# Supplementary material for: Anion recognition by N-confused calix[4]pyrrole-α-carbaldehyde and its Knoevenagel reaction derivatives
Source: Royal Society of Chemistry journal article supplement (doi:10.1039/b616467f), 2007-01-01

## Anion recognition by N-confused calix[4]pyrrole- $\alpha$ -carbaldehyde and its Knoevenagel reaction derivatives

Wim Dehaen,<sup>a,\*</sup> Philip A. Gale,<sup>b,\*</sup> Sergio E. García-Garrido<sup>b</sup>, Maarten Kostermans<sup>a</sup> and Mark E. Light<sup>b</sup>

<sup>a</sup> Molecular Design and Synthesis, Department of Chemistry, University of Leuven, B-3001 Leuven, Belgium. Fax: 32 16 32 79 90; Tel: 32 16 32 74 39; E-mail: [wim.dehaen@chem.kuleuven.be](mailto:wim.dehaen@chem.kuleuven.be)

<sup>b</sup> School of Chemistry, University of Southampton, Southampton, UK SO17 1BJ.

Fax: +44 23 8059 6805; Tel: +44 23 8059 3332;

E-mail: [Philip.gale@soton.ac.uk](mailto:Philip.gale@soton.ac.uk)

### Supplementary information

Electronic supplementary information: <sup>1</sup>H NMR titration curves:

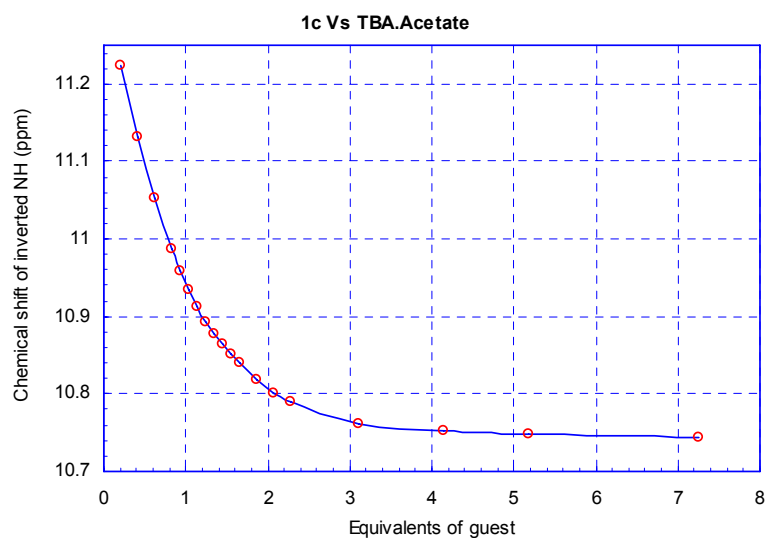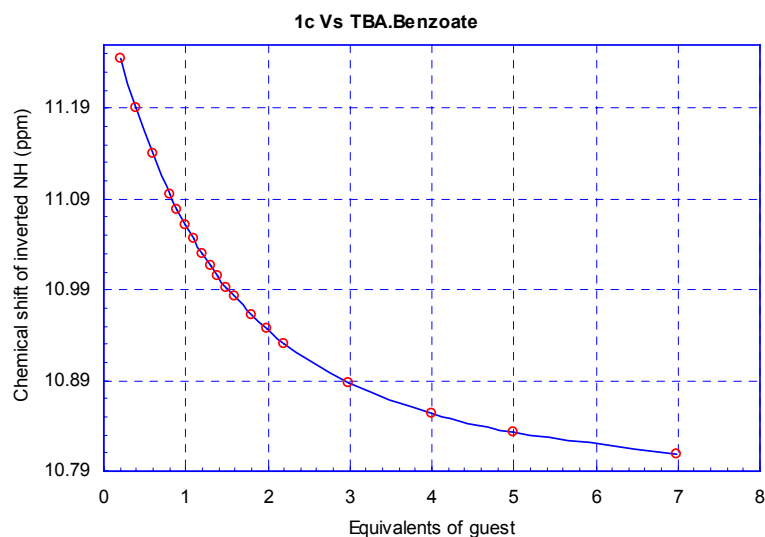

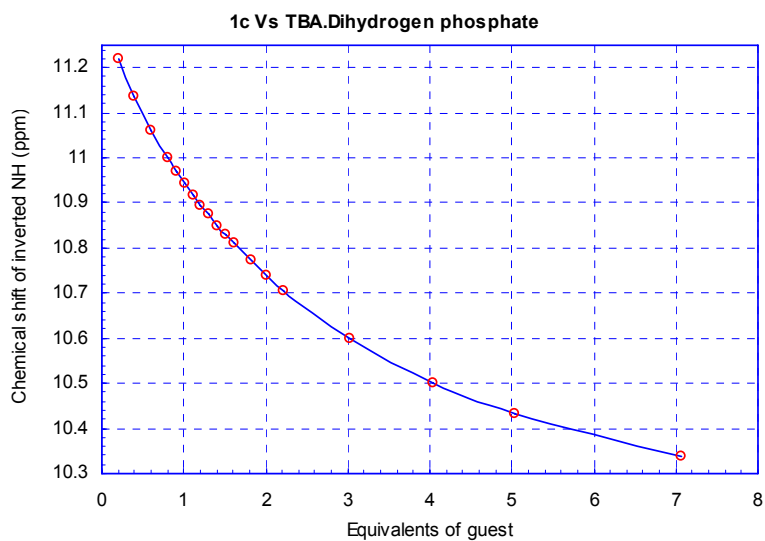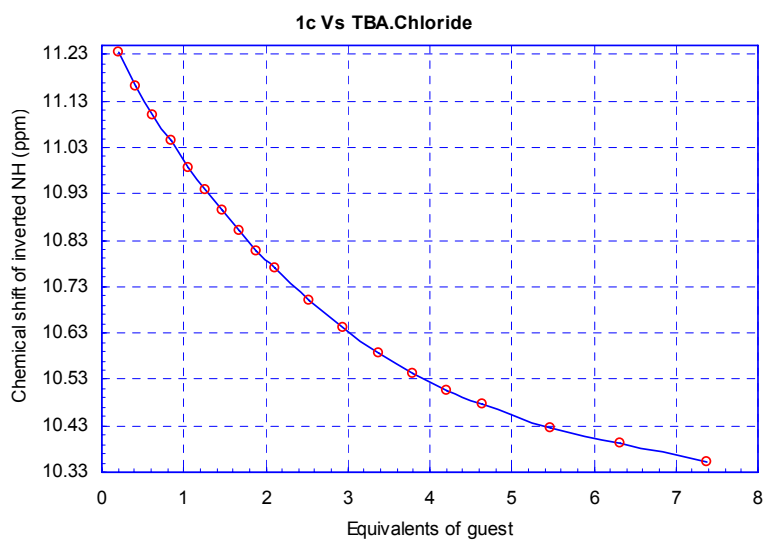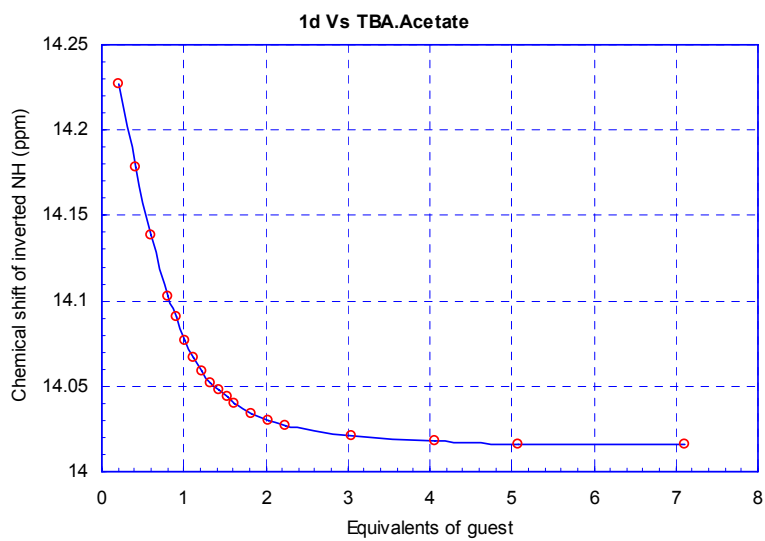

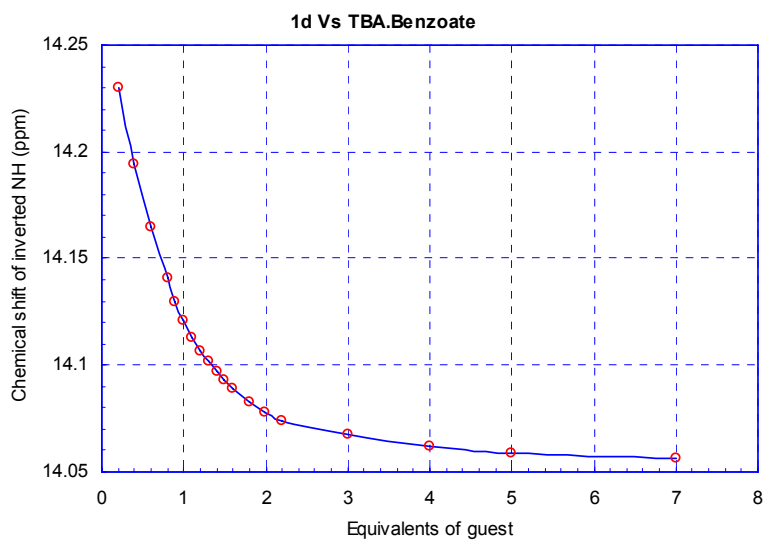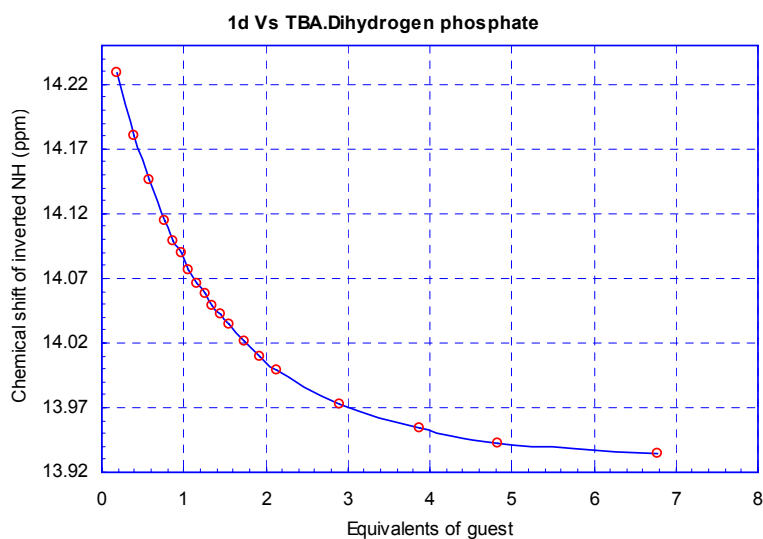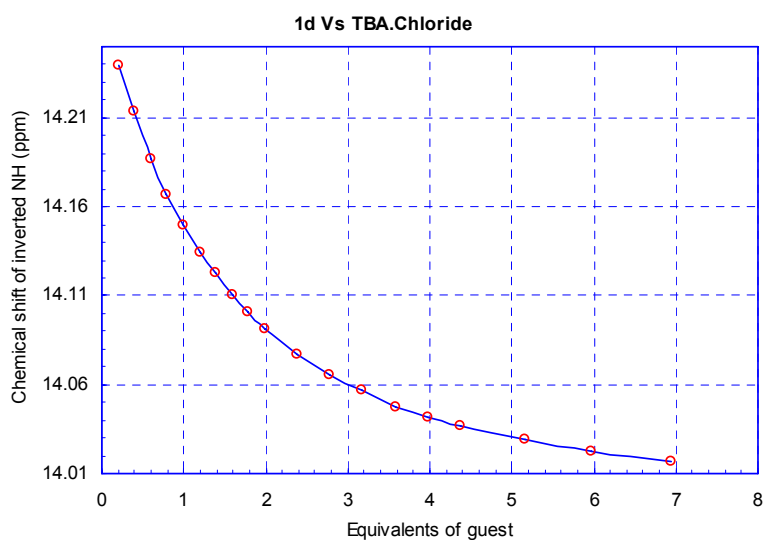

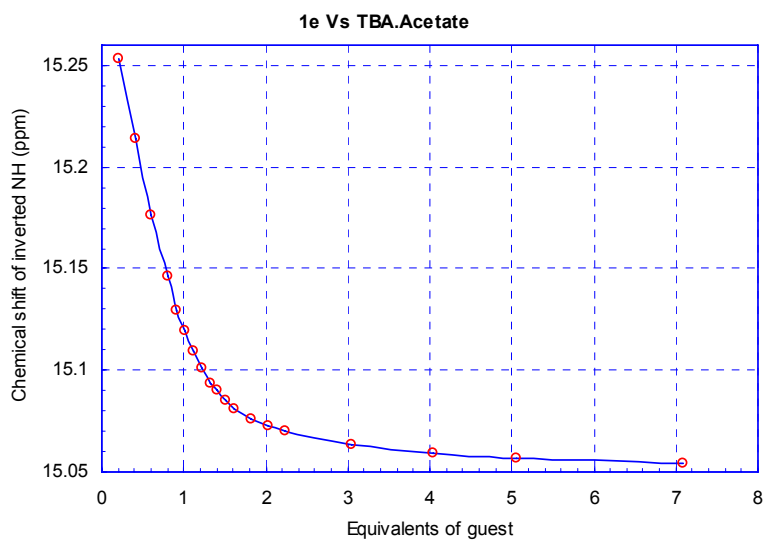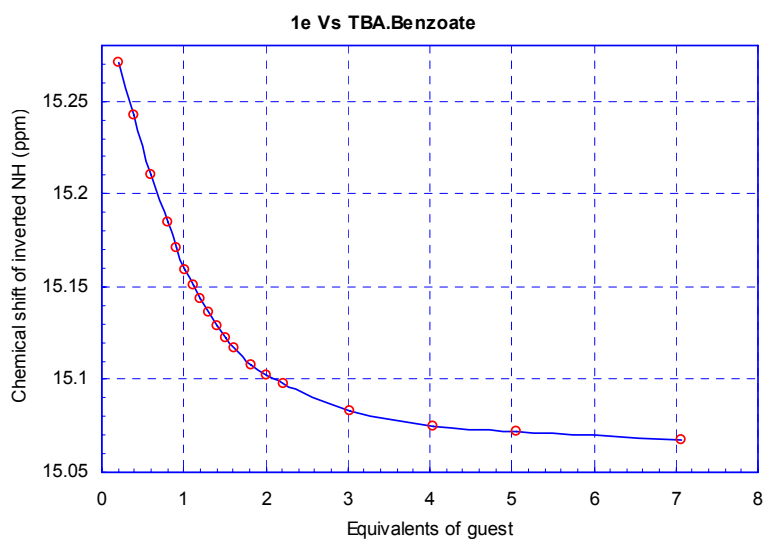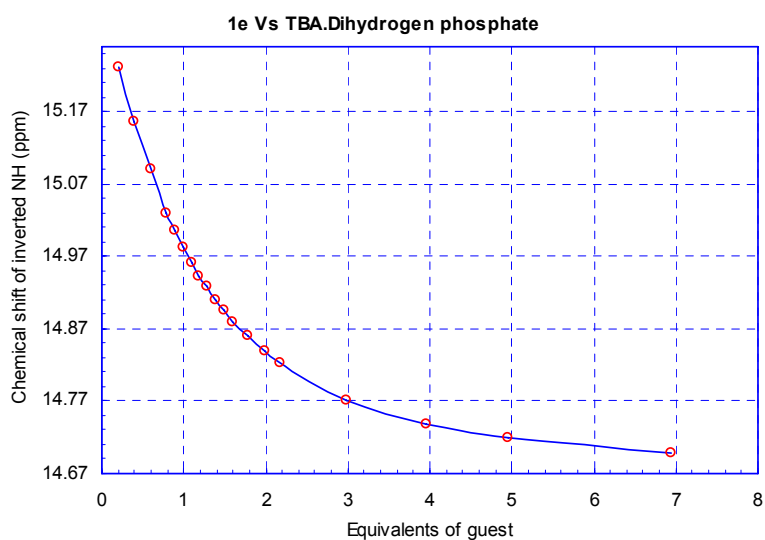

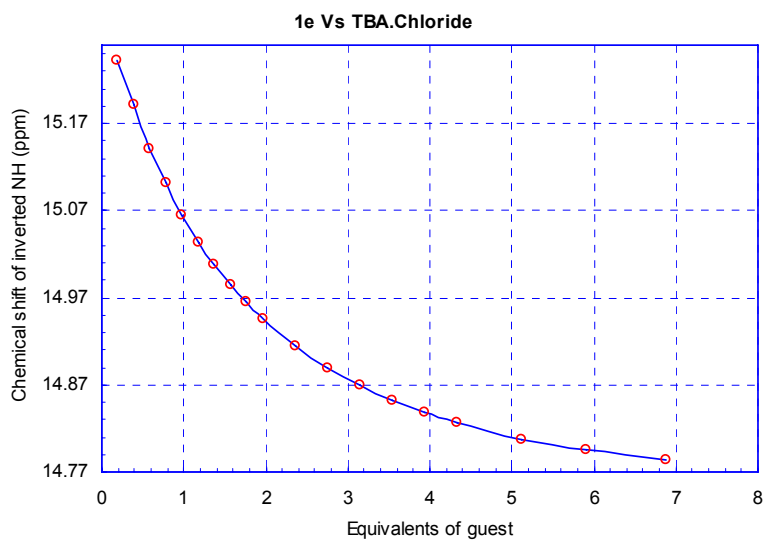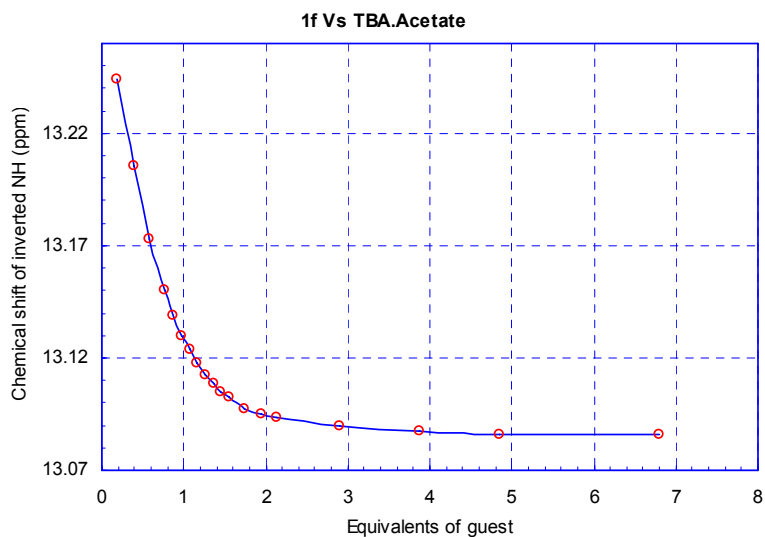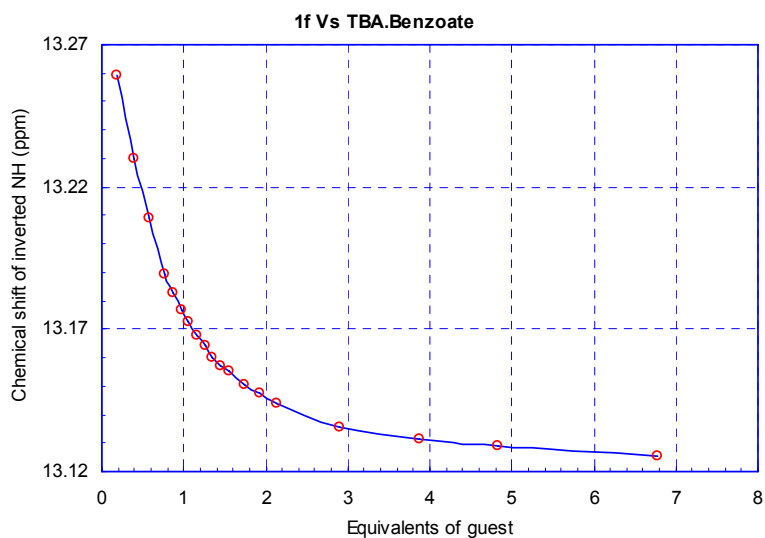

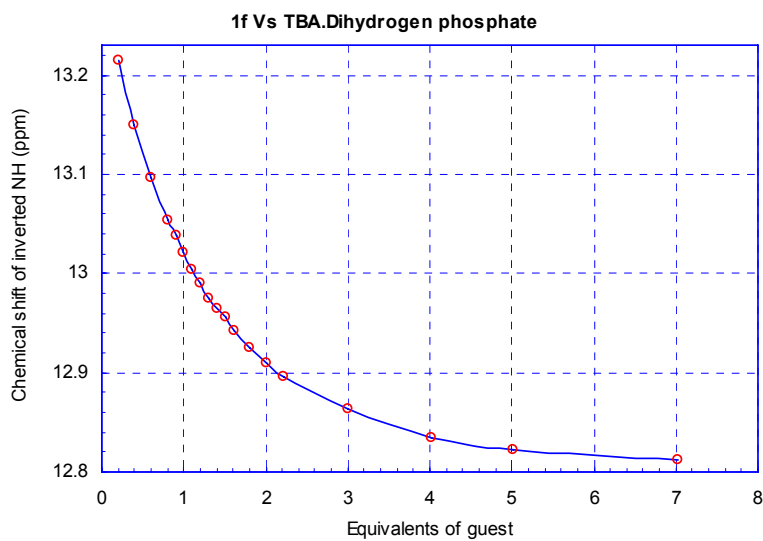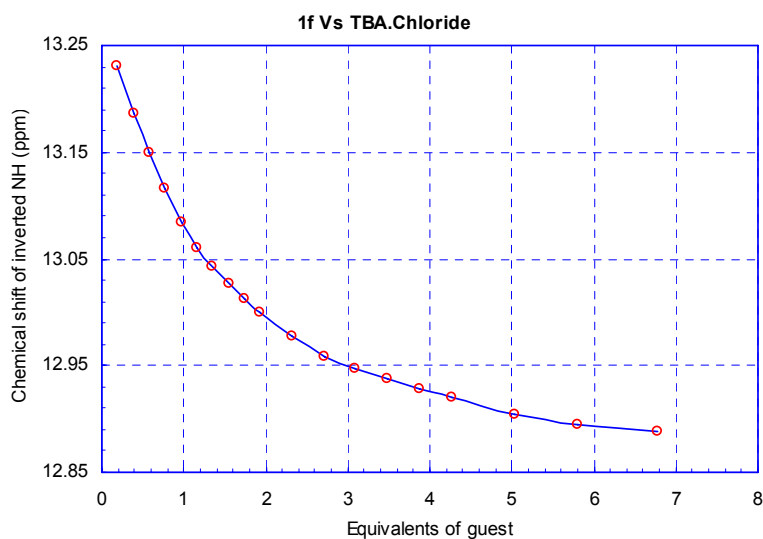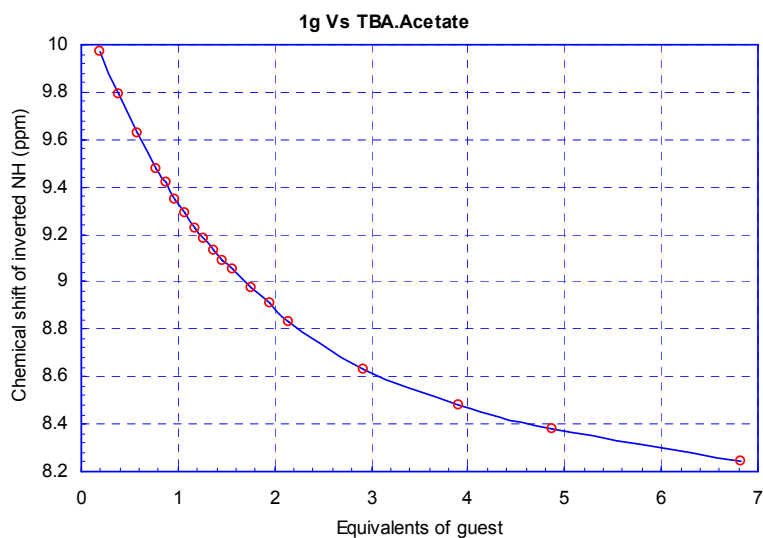

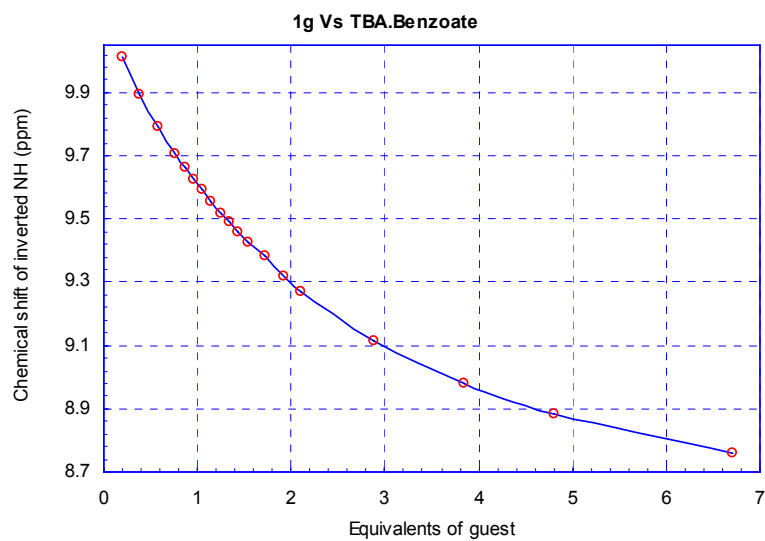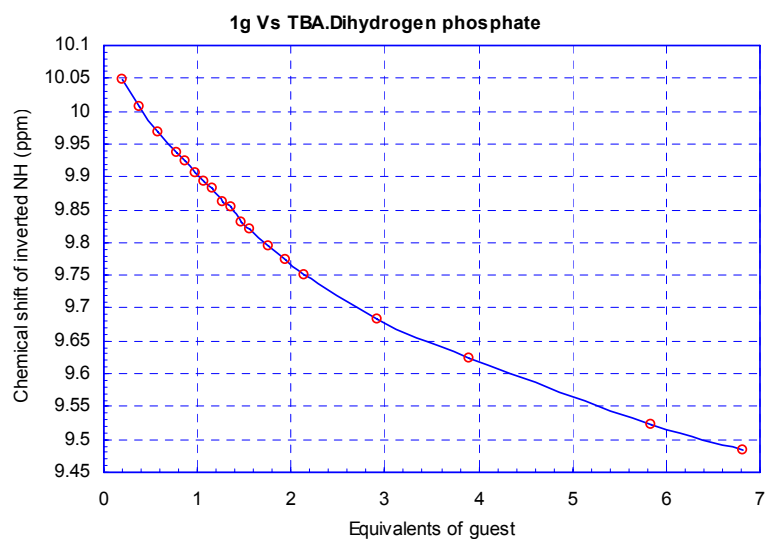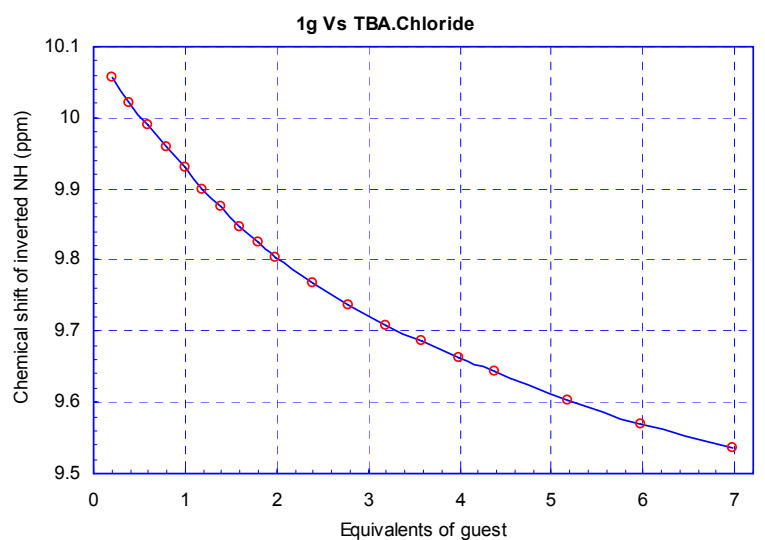

Supplement: b616467f.pdf [file b616467f.pdf]
